# Supplementary material for: Direct ink writing of silver nanowire-based flexible temperature sensors on fabric for wearable thermal monitoring
Source: Royal Society of Chemistry journal article supplement (doi:10.1039/d5tc04082e), 2026-01-01
Supplement: d5tc04082e1.pdf [file d5tc04082e1.pdf]

## Supplementary information

# Direct Ink Writing of Silver Nanowire-Based Flexible Temperature Sensors on Fabric for Wearable Thermal Monitoring

Jiajun Huang,<sup>a</sup> Shihao Yang,<sup>a</sup> Zhijie Ye,<sup>a</sup> Xinpeng Wang,<sup>ab</sup> Ziyi Fang,<sup>a</sup> Qi Yu,<sup>a</sup> Bowen  
Li<sup>a</sup> and Yue-Hui Wang<sup>\*a</sup>

<sup>a</sup> Zhongshan Institute, University of Electronic Science and Technology of China, Zhongshan  
528402, China.

<sup>b</sup> Department of Material and Energy, University of Electronic Science and Technology of China,  
Chengdu 610054, China

\* Corresponding author. E-mail address: [wangzsedu@126.com](mailto:wangzsedu@126.com) (Yue-Hui Wang)

## CAPTIONS

**Figure S1** Graphic parameters of the PTC thermistor.

**Figure S2** Viscosity of the AgNW-based conductive ink at shear rate of  $50\text{ s}^{-1}$ .

**Figure S3** Viscosity of the AgNW-based conductive ink at shear rates ranging from 0 to  $150\text{ s}^{-1}$ .

**Figure S4** UV-visible absorption spectra of the AgNW-based conductive ink and pristine AgNWs.

**Figure S5** TG-DSC analysis of the AgNW-based conductive ink.

**Figure S6** Sheet resistance values at different positions of the PTC thermistor.

**Figure S7** Maximum allowable operating temperature of the AgNW-based flexible temperature sensor.

**Figure S8** Microstructure of the copper wire before and after oxidation.

**Figure S9** Volt-ampere characteristics curve of the AgNW-based flexible temperature sensor.

**Figure S10** Comparison of the AgNW-based flexible temperature sensor with currently reported sensors.

**Table S1** Comparison of the AgNW-based flexible temperature sensor with currently reported sensors.

## FIGURES

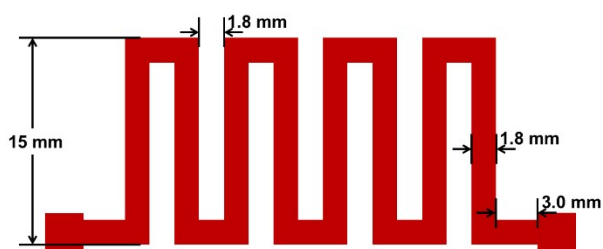

**Figure S1** Graphic parameters of the PTC thermistor.

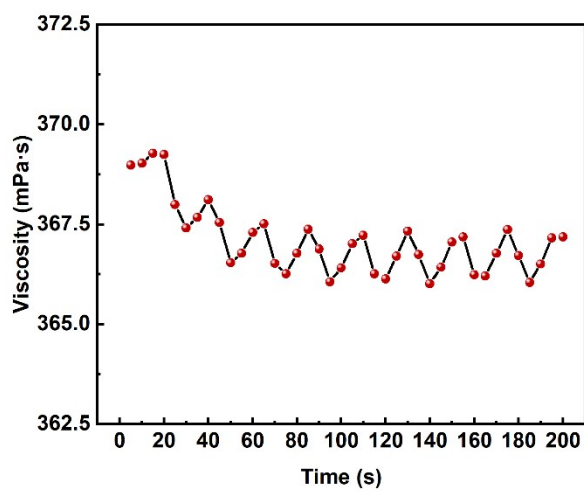

**Figure S2** Viscosity of the AgNW-based conductive ink at shear rate of  $50 \text{ s}^{-1}$ .

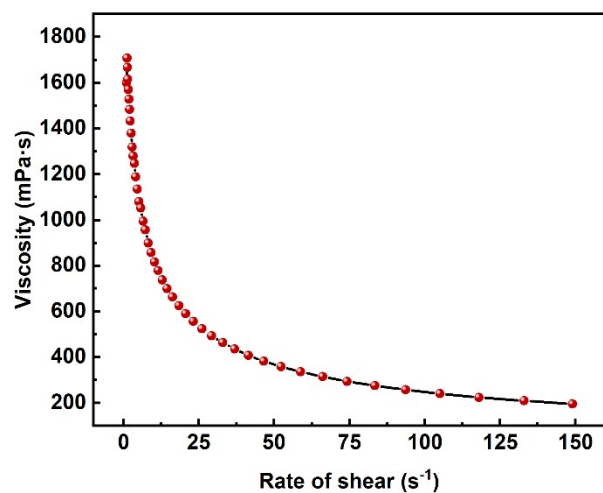

**Figure S3** Viscosity of the AgNW-based conductive ink at shear rates ranging from 0 to 150  $\text{s}^{-1}$ .

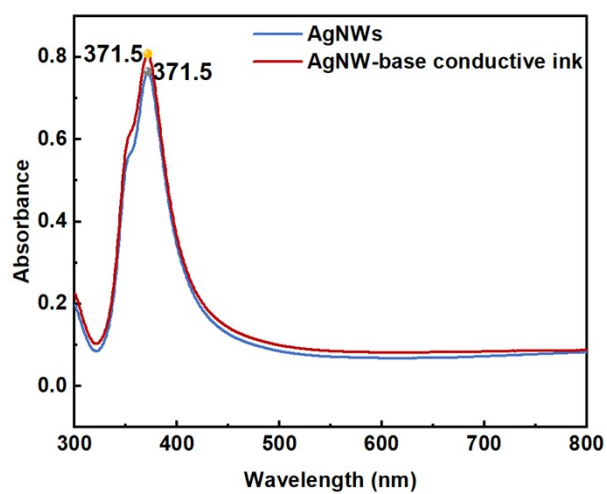

**Figure S4** UV-visible absorption spectra of the AgNW-based conductive ink and pristine AgNWs.

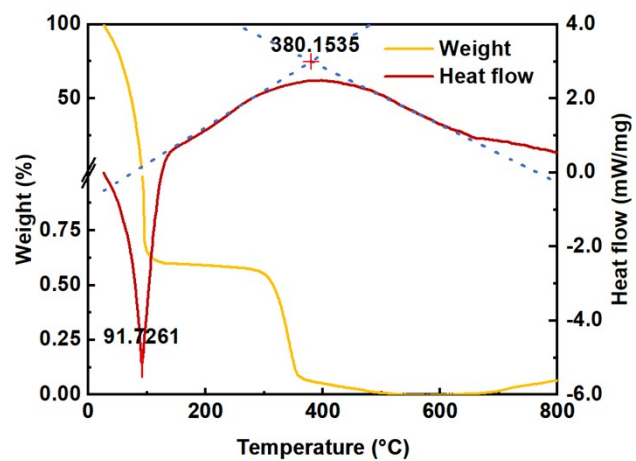

**Figure S5** TG-DSC analysis of the AgNW-based conductive ink.

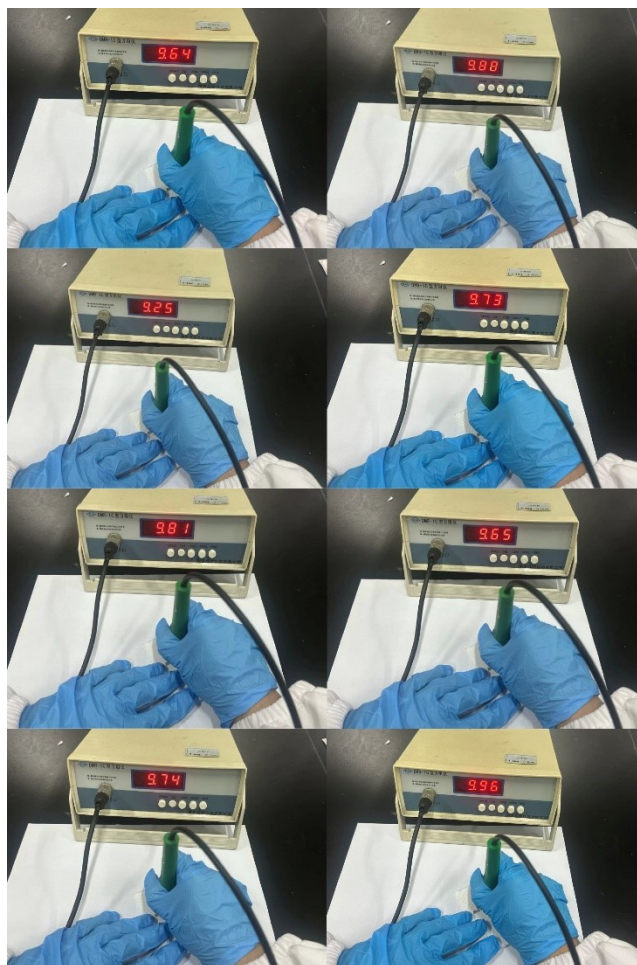

**Figure S6** Sheet resistance values at different positions of the PTC thermistor.

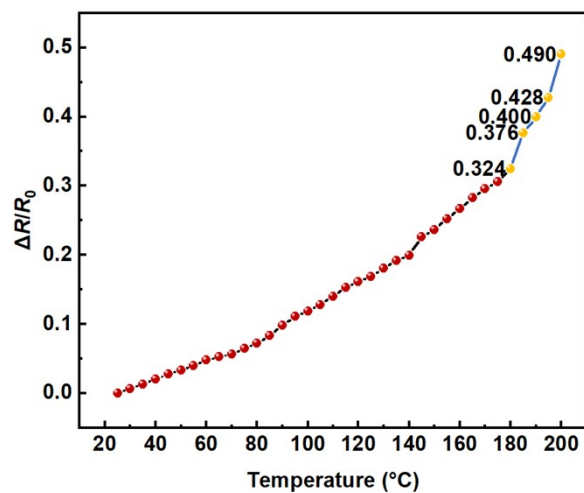

**Figure S7** Maximum allowable operating temperature of the AgNW-based flexible temperature sensor.

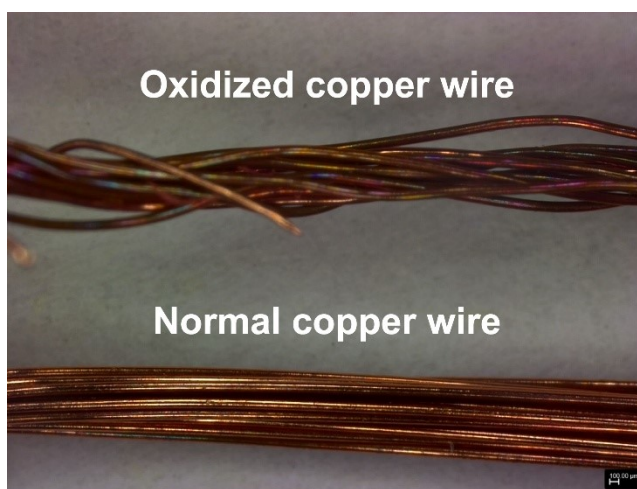

**Figure S8** Microstructure of the copper wire before and after oxidation.

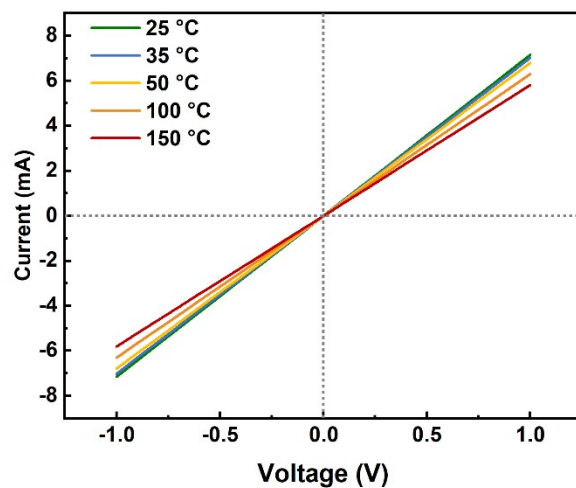

**Figure S9** Volt-ampere characteristics curve of the AgNW-based flexible temperature sensor.

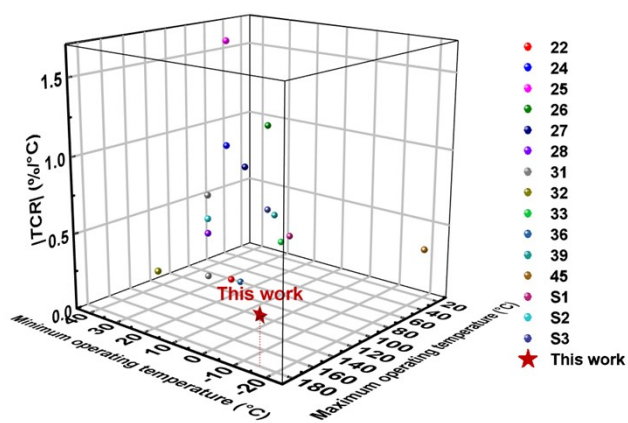

**Figure S10** Comparison of the AgNW-based flexible temperature sensor with currently reported sensors.

## TABLES

**Table S1** Comparison of the AgNW-based flexible temperature sensor with currently reported sensors.

| Temperature-sensitive material | Flexible substrate          | TCR (%/°C)                                                                       | Temperature range (°C) | Responds time (s) | Linearity                     | Reference |
|--------------------------------|-----------------------------|----------------------------------------------------------------------------------|------------------------|-------------------|-------------------------------|-----------|
| CNTs                           | PDMS                        | -0.046 <sup>#</sup><br>(0.55 Ω/°C, ~1175 Ω)                                      | 25–90                  | --                | Linear                        | 22        |
| MWCNT/CB                       | PVA/Gly organohydrogel      | -0.935                                                                           | 30–80                  | --                | Linear<br>( $R^2 = 0.99$ )    | 24        |
| CNTs                           | XSBR                        | -1.636                                                                           | 30–80                  | --                | Nonlinear                     | 25        |
| MWCNTs                         | Fabric                      | -1.04                                                                            | 25–50                  | --                | Nonlinear                     | 26        |
| graphene                       | PDMS                        | 0.8                                                                              | 25–75                  | 1.32–3.91         | Linear                        | 27        |
| rGO                            | PET                         | 0.37                                                                             | 30–100                 | 0.196–0.274       | Linear<br>( $R^2 = 0.996$ )   | 28        |
| rGO                            | PET                         | 0.6345                                                                           | 30–100                 | 1.2               | Linear                        | 31        |
| MWCNTs                         | PET                         | 0.068                                                                            | 30–100                 | --                | Linear                        | 31        |
| AgNPs                          | NP films                    | 0.235 ± 0.0176                                                                   | 30–150                 | --                | Linear                        | 32        |
| AgNWs                          | PIC hydrogels               | 0.24                                                                             | 20–50                  | --                | Linear                        | 33        |
| Cr/Au                          | PI/PDMS                     | 0.00104                                                                          | 25–80                  | 1                 | Linear<br>( $R^2 = 0.999$ )   | 36        |
| Ag                             | TPU-coated polyester fabric | 0.262                                                                            | 25–42                  | --                | Linear<br>( $R^2 = 0.9955$ )  | 39        |
| AgNWs                          | CPI                         | 0.33                                                                             | -20–20                 | --                | Linear                        | 45        |
| Ti/Au                          | PI/Polyester yarns          | 0.258                                                                            | 20–40                  | 2.4 ± 0.5         | Linear                        | 60        |
| MWCNTs                         | Fabric                      | 0.471                                                                            | 30–100                 | --                | Linear<br>( $R^2 = 0.9806$ )  | 61        |
| PPy                            | PP nonwoven fabric          | 0.447                                                                            | 25–50                  | 50                | Linear<br>( $R^2 = 0.99374$ ) | 62        |
| AgNWs                          | Fabric                      | 0.229 (-15–20 °C)<br>0.115 (20–70 °C)<br>0.200 (70–135 °C)<br>0.315 (135–150 °C) | -15–180                | 7–102             | Linear<br>( $R^2 > 0.988$ )   | This work |

<sup>#</sup> Denotes data processed through a formula using other relevant data from the references.
